# Supplementary material for: Move-in Ready or Fixer-Upper? VC Specialization and Start-up Innovation
Source: Atypon-hosted journal article supplement (doi:10.1287/stsc.2022.0176), 2022-10-26
Supplement: stsc.2022.0176.sm1.pdf [file stsc.2022.0176.sm1.pdf]

**ONLINE APPENDIX**

**MOVE-IN READY OR FIXER-UPPER?  
VC SPECIALIZATION AND STARTUP INNOVATION**

***STRATEGY SCIENCE***

Elisa Alvarez-Garrido  
University of South Carolina  
Columbia, SC 29208  
[Elisa.AlvarezGarrido@moore.sc.edu](mailto:Elisa.AlvarezGarrido@moore.sc.edu)

**Table A1. Second stage: Cox regression on the time to first patent after VC investment, by research environment**

| Sample, by research environment             | High              | High              | Low                | Low                |
|---------------------------------------------|-------------------|-------------------|--------------------|--------------------|
| Endogeneity correction                      | No                | Yes               | No                 | Yes                |
| Model                                       | (1)               | (2)               | (3)                | (4)                |
| VC syndicate specialization: co-located     | 0.75**<br>(0.25)  | 0.30<br>(0.38)    | 0.04<br>(0.22)     | 0.85<br>(0.56)     |
| VC syndicate specialization: not co-located | 0.19<br>(0.36)    | -0.35<br>(0.56)   | 0.68†<br>(0.39)    | 1.33*<br>(0.56)    |
| VC syndicate experience                     | 0.03<br>(0.04)    | 0.02<br>(0.03)    | 0.01<br>(0.04)     | 0.04<br>(0.03)     |
| Startup capital                             | 0.44**<br>(0.17)  | 0.58***<br>(0.14) | -0.11<br>(0.29)    | -0.34<br>(0.30)    |
| Startup patents                             | 0.31***<br>(0.09) | 0.30***<br>(0.09) | 0.37***<br>(0.08)  | 0.37***<br>(0.09)  |
| Startup publications                        | -0.09†<br>(0.05)  | -0.11*<br>(0.05)  | 0.25***<br>(0.07)  | 0.28***<br>(0.06)  |
| Startup age                                 | -0.01<br>(0.07)   | -0.03<br>(0.07)   | -0.26**<br>(0.10)  | -0.25**<br>(0.10)  |
| After AIPA                                  | -0.26**<br>(0.09) | -0.27**<br>(0.09) | -0.59***<br>(0.14) | -0.57***<br>(0.14) |
| Country industry patent stock               |                   |                   | -0.14<br>(0.26)    | -0.19<br>(0.25)    |
| State industry patent stock                 | 0.31***<br>(0.08) | 0.31***<br>(0.08) |                    |                    |
| Country GDP per capita                      |                   |                   | 0.25<br>(0.33)     | 0.20<br>(0.33)     |
| State GDP per capita                        | -0.11<br>(0.53)   | -0.19<br>(0.55)   |                    |                    |
| Residuals                                   |                   | 0.84<br>(0.55)    |                    | -1.15<br>(0.72)    |
| Observations                                | 464               | 464               | 444                | 444                |
| Log-Likelihood                              | -1,582            | -1,582            | -1,076             | -1,075             |

*Note.* Splitting the sample by median research environment (Country industry patent stock) coincidentally splits the sample into US (high) and not-US (low). All continuous independent variables are logged. Industry segment fixed effects included. Baseline hazard stratified by whether or not the startup has patents at time of VC investment. Efron method for handling ties. Standard errors clustered by startup country (or state, for US regressions), in parentheses.

\*\*\*p < 0.001, \*\*p < 0.01, \*p < 0.05, †p < 0.10

**Table A2. VC syndicate specialization measured as mean, second stage: Cox regression on the time to first patent after VC investment**

| Endogeneity correction             | No                 | Yes                |
|------------------------------------|--------------------|--------------------|
| Model                              | (1)                | (2)                |
| VC syndicate specialization (mean) | 0.48*<br>(0.19)    | 3.22*<br>(1.58)    |
| VC syndicate experience            | 0.04**<br>(0.02)   | 0.17**<br>(0.06)   |
| Startup capital                    | 0.45***<br>(0.08)  | 0.25†<br>(0.14)    |
| Startup patents                    | 0.26***<br>(0.04)  | 0.27***<br>(0.04)  |
| Startup publications               | -0.01<br>(0.09)    | 0.01<br>(0.09)     |
| Startup age                        | -0.10<br>(0.07)    | -0.05<br>(0.08)    |
| After AIPA                         | -0.35***<br>(0.08) | -0.30***<br>(0.07) |
| Country industry patent stock      | 0.11*<br>(0.05)    | 0.16**<br>(0.06)   |
| Country GDP per capita             | 0.34<br>(0.28)     | 0.15<br>(0.30)     |
| Residuals                          |                    | -2.86†<br>(1.59)   |
| Observations                       | 908                | 908                |
| Log-Likelihood                     | -3072              | -3070              |

*Note.* All continuous independent variables are logged. Industry segment fixed effects included. Baseline hazard stratified by whether or not the startup has patents at time of VC investment. Efron method for handling ties. Standard errors clustered by startup country, in parentheses.

\*\*\*p < 0.001, \*\*p < 0.01, \*p < 0.05, †p < 0.10

**Table A3. VC syndicate specialization measured as mean, second stage: Cox regression on the time to first patent after VC investment, by research environment**

| Sample, by research environment | High              | High              | Low                | Low                |
|---------------------------------|-------------------|-------------------|--------------------|--------------------|
| Endogeneity correction          | No                | Yes               | No                 | Yes                |
| Model                           | (1)               | (2)               | (3)                | (4)                |
| VC syndicate specialization     | 0.42<br>(0.42)    | 3.83<br>(10.65)   | 0.08<br>(0.39)     | 3.36*<br>(1.71)    |
| VC syndicate experience         | 0.04<br>(0.04)    | 0.18<br>(0.44)    | 0.02<br>(0.05)     | 0.18*<br>(0.09)    |
| Startup capital                 | 0.49*<br>(0.20)   | 0.27<br>(0.59)    | 0.02<br>(0.26)     | -0.28<br>(0.31)    |
| Startup patents                 | 0.30**<br>(0.09)  | 0.31**<br>(0.10)  | 0.37***<br>(0.08)  | 0.39***<br>(0.09)  |
| Startup publications            | -0.12*<br>(0.05)  | -0.09<br>(0.10)   | 0.25***<br>(0.07)  | 0.28***<br>(0.07)  |
| Startup age                     | -0.01<br>(0.07)   | 0.04<br>(0.20)    | -0.25**<br>(0.09)  | -0.20†<br>(0.10)   |
| After AIPA                      | -0.25**<br>(0.09) | -0.24*<br>(0.09)  | -0.58***<br>(0.14) | -0.49***<br>(0.15) |
| Country industry patent stock   |                   |                   | -0.14<br>(0.26)    | -0.22<br>(0.26)    |
| State industry patent stock     | 0.33***<br>(0.08) | 0.33***<br>(0.08) |                    |                    |
| Country GDP per capita          |                   |                   | 0.30<br>(0.33)     | 0.10<br>(0.34)     |
| State GDP per capita            | -0.08<br>(0.54)   | -0.09<br>(0.54)   |                    |                    |
| Residuals                       |                   | -3.44<br>(10.51)  |                    | -3.47*<br>(1.65)   |
| Observations                    | 464               | 464               | 444                | 444                |
| Log-Likelihood                  | -1584             | -1584             | -1078              | -1076              |

*Note.* Splitting the sample by median research environment (Country industry patent stock) coincidentally splits the sample into US (high) and not-US (low). All continuous independent variables are logged. Industry segment fixed effects included. Baseline hazard stratified by whether or not the startup has patents at time of VC investment. Efron method for handling ties. Standard errors clustered by startup country (or state, for US regressions), in parentheses.

\*\*\*p < 0.001, \*\*p < 0.01, \*p < 0.05, †p < 0.10

**Table A4. Second stage: Flexible parametric survival analysis on the time to first patent after VC investment**

| Endogeneity correction        | No                 | Yes                |
|-------------------------------|--------------------|--------------------|
| Model                         | (1)                | (2)                |
| VC syndicate specialization   | 0.58*<br>(0.27)    | 2.92*<br>(1.35)    |
| VC syndicate experience       | 0.06*<br>(0.03)    | 0.15*<br>(0.06)    |
| Startup capital               | 0.27†<br>(0.15)    | -0.08<br>(0.25)    |
| Startup patents               | 0.92***<br>(0.05)  | 0.93***<br>(0.05)  |
| Startup publications          | -0.09<br>(0.06)    | -0.06<br>(0.06)    |
| Startup age                   | -0.08<br>(0.07)    | -0.03<br>(0.07)    |
| After AIPA                    | -0.45***<br>(0.09) | -0.38***<br>(0.10) |
| Country industry patent stock | 0.06<br>(0.07)     | 0.11<br>(0.07)     |
| Country GDP per capita        | 0.58<br>(0.36)     | 0.36<br>(0.38)     |
| Constant                      | -2.41***<br>(0.44) | -3.32***<br>(0.68) |
| Residuals                     |                    | -2.43†<br>(1.38)   |
| Observations                  | 908                | 908                |
| Log-Likelihood                | -1237              | -1236              |

*Note.* All continuous independent variables are logged. Industry segment fixed effects included. Baseline hazard stratified by whether or not the startup has patents at time of VC investment. Model estimated with 6 knots. Standard errors, in parentheses.

\*\*\* $p < 0.001$ , \*\* $p < 0.01$ , \* $p < 0.05$ , † $p < 0.10$
